# Supplementary material
Source: Springer Nature journal article supplement (https://www.springermedizin.de/resource/supplementary/13075_2012_3818_MOESM6_ESM.pdf/9695414)

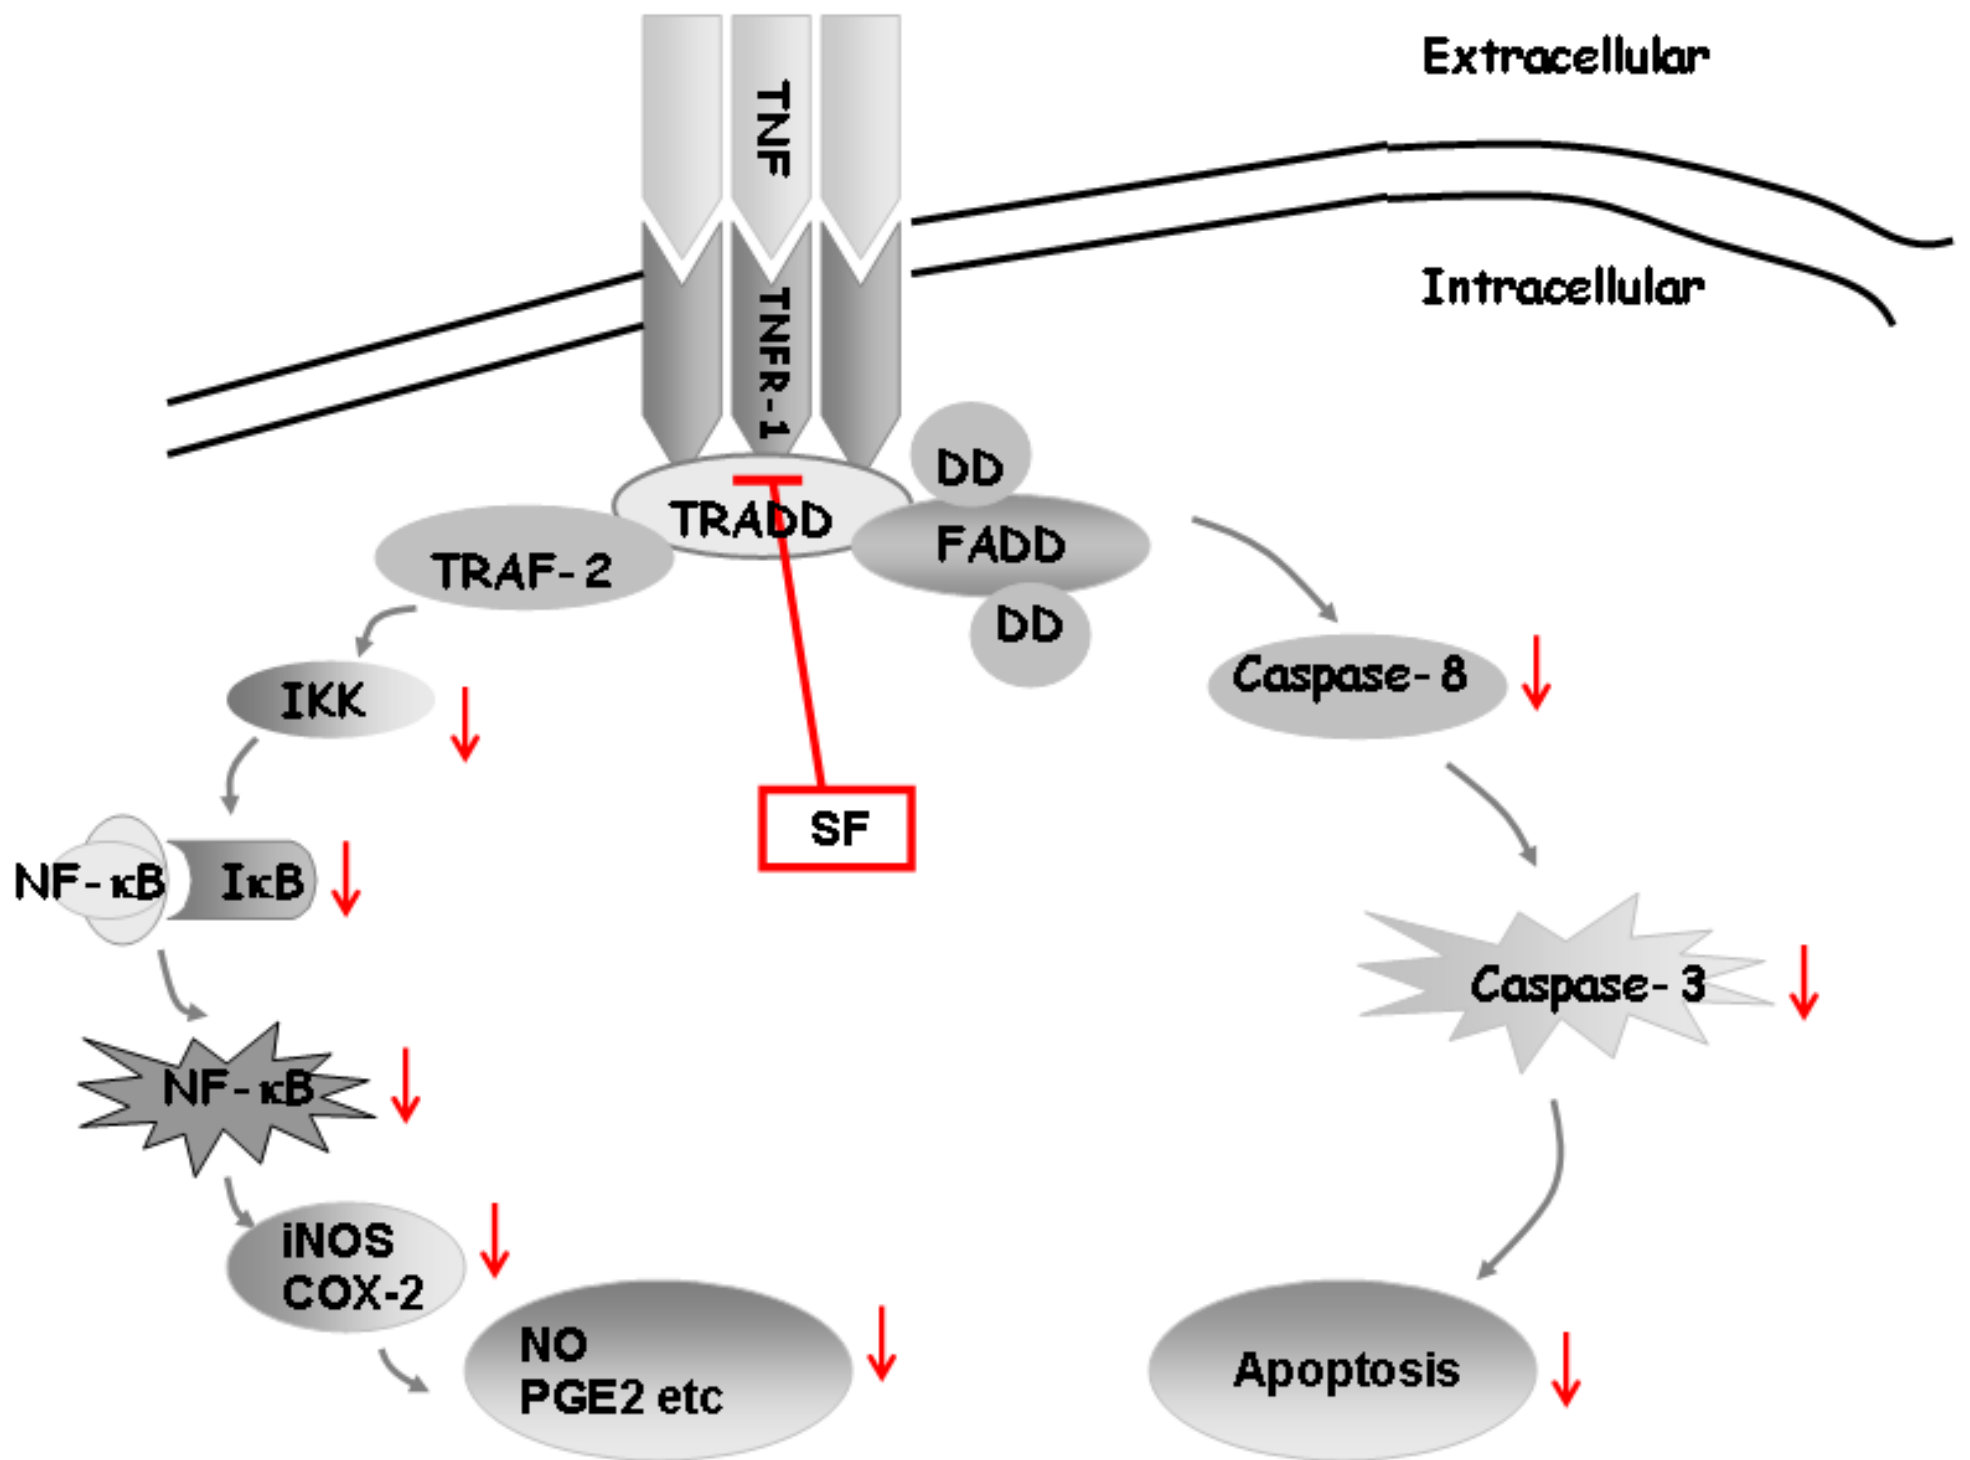

Supplement: MOESM6 [file 9695414]
